# Supplementary material
Source: HighWire-hosted journal article supplement (https://bmjopen.bmj.com/content/12/11/e065517)
Supplement: inline-supplementary-material-4 [file inline-supplementary-material-4.pdf]

**Additional file 4: Breakdown of tools in the health provider survey instrument**

|    | <b>Name of Tool and Sections</b>                         | <b>Source</b>                                 | <b>Items</b> | <b>Response type</b> | <b>Alpha coeff.</b> |
|----|----------------------------------------------------------|-----------------------------------------------|--------------|----------------------|---------------------|
| 1  | *Organisational Readiness for Implementing change (ORIC) | Shea et al <sup>19</sup>                      | 12           | Likert scale 1-5     | 0.949               |
| 2  | *Individual readiness for change                         | Vakola et al <sup>8</sup>                     | 6            | Likert scale 1-7     | 0.733               |
| 3  | Socio-demographic characteristics                        | Adapted from the literature                   | 15           |                      |                     |
| 4  | Perception on women's rights during childbirth           | Childbirth Connection <sup>20</sup>           | 13           | Likert scale 1-5     | 0.575               |
| 5  | Provider awareness of mistreatment in their own facility | Maternal & Child Health program <sup>21</sup> | 12           | Likert scale 1-5     | 0.638               |
| 6  | Change valence                                           | Shea et al <sup>19</sup>                      | 6            | Likert scale 1-5     | 0.902               |
| 7  | Informational assessments                                | Phillip <sup>22</sup>                         | 8            | Likert scale 1-5     | 0.648               |
| 8  | Perception on RMC resource availability                  | WHO Recommendation for labour <sup>1</sup>    | 18           | Likert scale 1-5     | 0.669               |
| 10 | Core self-evaluation tool                                | Judge et al <sup>18</sup>                     | 12           | Likert scale 1-5     | 0.598               |
| 11 | Employee job satisfaction tool                           | Management Sciences for Health <sup>23</sup>  | 10           | Likert scale 1-5     | 0.603               |
|    | Total                                                    |                                               | 112          |                      |                     |

\*Outcome variables; WHO: World Health Organisation
